# Supplementary material for: Serrulin: A Glycine-Rich Bioactive Peptide from the Hemolymph of the Yellow Tityus serrulatus Scorpion
Source: MDPI journal article supplement (doi:10.3390/toxins11090517), 2019-09-06
Supplement: s1 [file s1]

## Supplementary Materials: Serrulin: A Glycine-Rich Bioactive Peptide from the Hemolymph of the Yellow *Tityus serrulatus* Scorpion

Thiago Oliveira, Ursula Castro de Oliveira and Pedro Ismael da Silva Junior

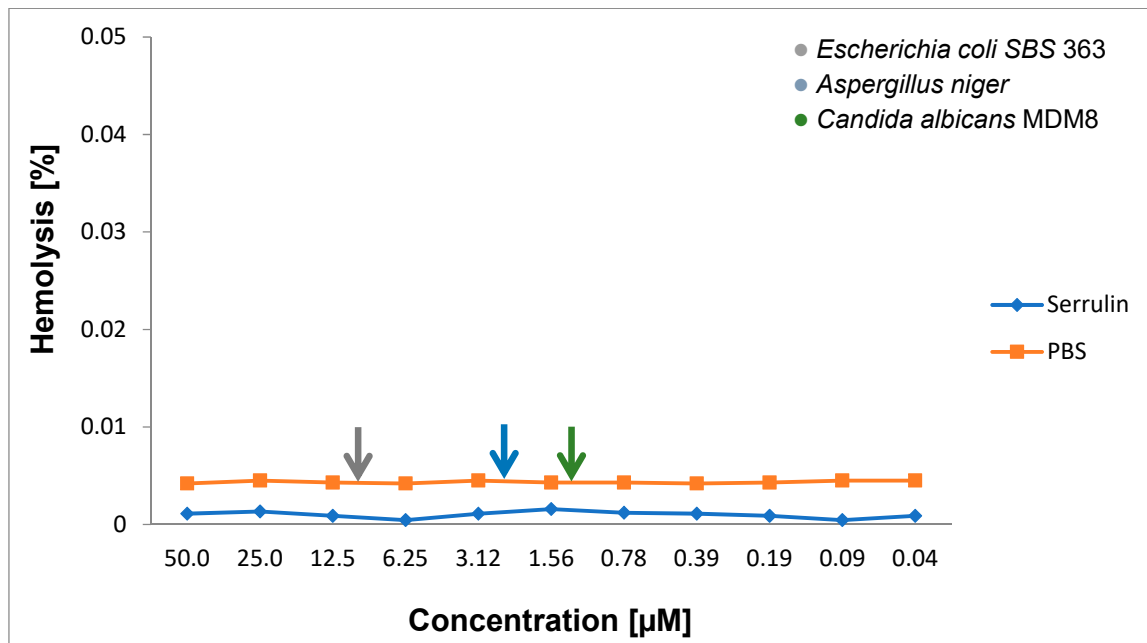

**Figure S1.** Hemolytic effects of serrulin on human erythrocytes. The concentration-response curve of the hemolytic activity of the peptide shows the maximum tested concentration (50 µM), which is very similar to that of the negative control (phosphate-buffered saline (PBS)).

```

Number of amino acids: 37
Molecular weight: 3048.29
Theoretical pI: 11.10

Amino acid composition: 
Ala (A) 0 0.0%
Arg (R) 2 5.4%
Asn (N) 0 0.0%
Asp (D) 0 0.0%
Cys (C) 0 0.0%
Gln (Q) 0 0.0%
Glu (E) 0 0.0%
Gly (G) 26 70.3%
His (H) 0 0.0%
Ile (I) 2 5.4%
Leu (L) 0 0.0%
Lys (K) 2 5.4%
Met (M) 0 0.0%
Phe (F) 4 10.8%
Pro (P) 0 0.0%
Ser (S) 0 0.0%
Thr (T) 0 0.0%
Trp (W) 0 0.0%
Tyr (Y) 1 2.7%
Val (V) 0 0.0%
Pyl (O) 0 0.0%
Sec (U) 0 0.0%

(O) 0 0.0%
(Z) 0 0.0%
(X) 0 0.0%

Total number of negatively charged residues (Asp + Glu): 0
Total number of positively charged residues (Arg + Lys): 4

Atomic composition:
Carbon C 133
Hydrogen H 195
Nitrogen N 45
Oxygen O 39
Sulfur S 0

Formula: C133H195N45O39
Total number of atoms: 412

Extinction coefficients:
This protein does not contain any Trp residues. Experience shows that
this could result in more than 10% error in the computed extinction coefficient.

Extinction coefficients are in units of M-1 cm2, at 280 nm measured in water.

Ext. coefficient 1490
Abs 0.1% (=1 g/l) 0.489

Estimated half-life:
The N-terminal of the sequence considered is G (Gly).

The estimated half-life is: 30 hours (mammalian reticulocytes, in vitro).
>20 hours (yeast, in vivo).
>10 hours (Escherichia coli, in vivo).
    
```

**Figure S2.** Physico-chemical parameters of serrulin. Data obtained by the sequence analysis, "GFGGGRGGFGGGRGGFGGGGIGGGFGGGYGGGKIKG," in ExPASy ProtParam. Information on the following is provided: The theoretical pI, molecular weight, total number of negatively and positively charged residues, atomic composition, extinction coefficients and percentage of amino acids found in the sample.

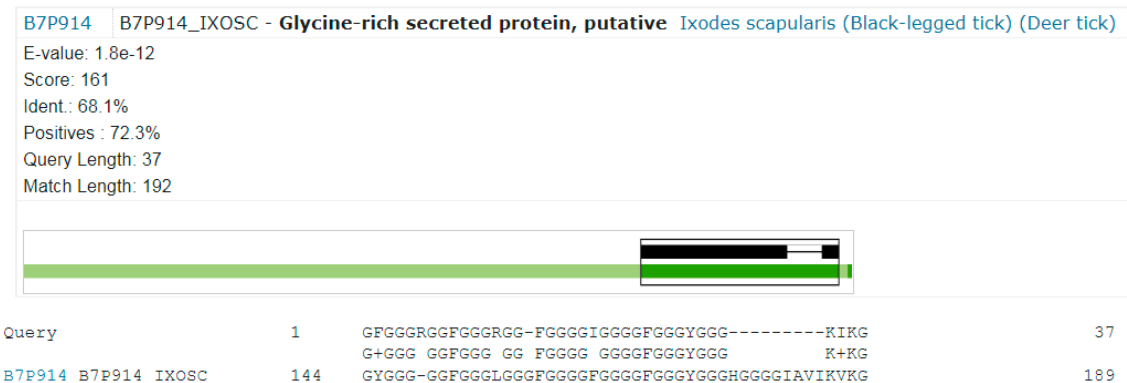

**Figure S3.** Results obtained by searching with BLAST (Basic Local Alignment Search Tool) using Uniprot (Universal Protein resource). The amino acid sequence of serrulin had a similarity of 68% to a protein found in the tick transcriptome of the species, *Ixodes scapularis*.
